# Supplementary material for: Cysteinyl leukotriene signaling through perinuclear CysLT1 receptors on vascular smooth muscle cells transduces nuclear calcium signaling and alterations of gene expression
Source: PubMed Central journal article supplement (PMC3438394; doi:10.1007/s00109-012-0904-1), 2012-04-20
Supplement: 109_2012_904_MOESM1_ESM.pdf [file 109_2012_904_MOESM1_ESM.pdf]

Eaton et al.

***Cysteinyl leukotriene signaling through perinuclear CysLT<sub>1</sub> receptors on vascular smooth muscle cells transduces nuclear calcium signaling and alterations of gene expression***

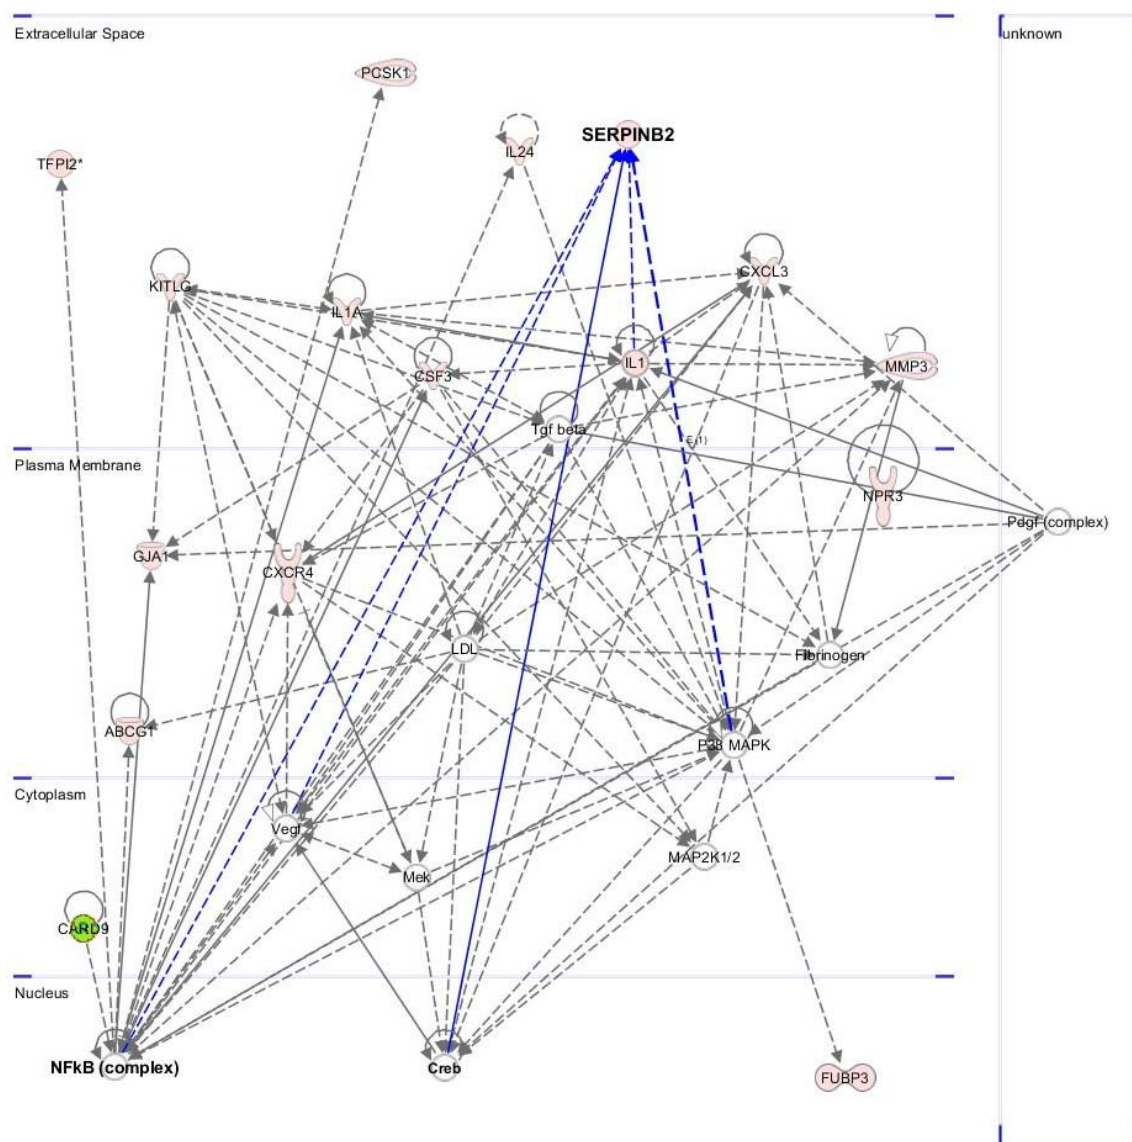

**Supplementary Fig 1. Functional gene network associated with upregulation by LTC<sub>4</sub> stimulation (derived from Ingenuity Pathway analysis).** Network shown, suggested to be implicated in cellular movement and hematopoietic system function, was found to be markedly upregulated (Fishers' exact test score  $1 \times 10^{-35}$ ) by LTC<sub>4</sub> stimulation based on analysis of significantly differentially expressed genes (Table 1). Red shading indicates significantly upregulated genes. Intensity of the shading is proportional to the fold change. Interactions involving PAI-2 are highlighted in blue.
